# Supplementary material
Source: Springer Nature journal article supplement (https://www.springerprofessional.de/resource/supplementary/13638_2012_637_MOESM18_ESM.pdf/11898690)

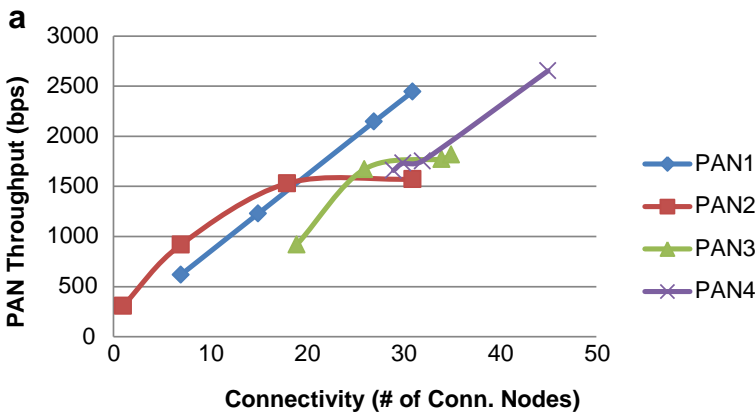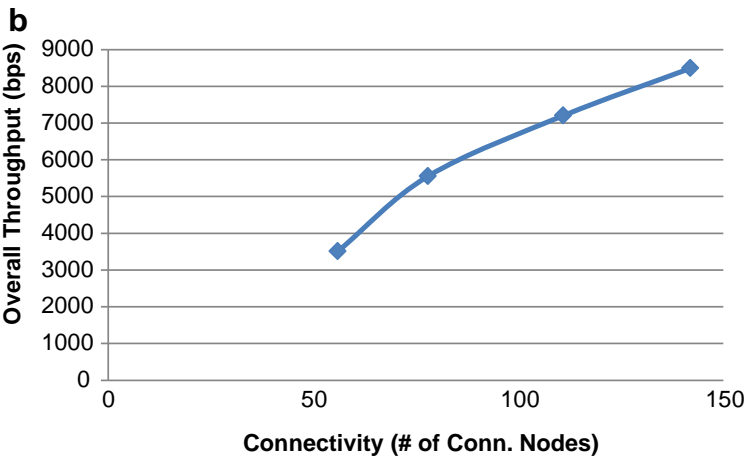

Supplement: MOESM18 [file 11898690]
